# Supplementary material for: Characterizing the surge behaviour and associated ice-dammed lake evolution of the Kyagar Glacier in the Karakoram
Source: Copernicus journal article supplement (doi:10.5194/tc-2022-253), 2023-01-13

**Table S1.** Mean differences and the standard deviation (SD) of elevation difference maps over off-glacier areas before and after co-registration process.

| DEM Product ID             | Date       | Statistics of stable ground differences (Product vs SRTM) (m) |        |           |         |
|----------------------------|------------|---------------------------------------------------------------|--------|-----------|---------|
|                            |            | Pre-mean                                                      | Pre-SD | Post-mean | Post-SD |
| AST14DEM_00302272001055811 | 2001/2/27  | 5.83                                                          | 10.51  | 0.37      | 10.19   |
| AST14DEM_00303312001055714 | 2001/3/31  | 10.60                                                         | 23.50  | 1.66      | 16.48   |
| AST14DEM_00304252001055043 | 2001/4/25  | 33.79                                                         | 22.40  | 1.89      | 21.46   |
| AST14DEM_00308022002054207 | 2002/8/2   | 6.36                                                          | 13.30  | 0.86      | 10.56   |
| AST14DEM_00305082003054658 | 2003/5/8   | 10.40                                                         | 38.21  | 0.31      | 39.56   |
| AST14DEM_00305032004054046 | 2004/5/3   | 6.36                                                          | 20.66  | 2.08      | 16.00   |
| AST14DEM_00305032004054037 | 2004/5/3   | 7.13                                                          | 16.84  | 1.91      | 12.27   |
| AST14DEM_00306112004054637 | 2004/6/11  | 2.57                                                          | 18.62  | -0.15     | 17.18   |
| AST14DEM_00310202005054549 | 2005/10/20 | -2.33                                                         | 12.36  | 0.66      | 9.95    |
| AST14DEM_00311142005053944 | 2005/11/14 | 25.98                                                         | 24.19  | 2.18      | 24.13   |
| AST14DEM_00311142005053953 | 2005/11/14 | 32.00                                                         | 27.54  | 3.42      | 31.54   |
| AST14DEM_00311302005053951 | 2005/11/30 | 28.50                                                         | 25.23  | 4.91      | 26.87   |
| AST14DEM_00302092006054532 | 2006/2/9   | -14.74                                                        | 18.74  | 0.55      | 15.16   |
| AST14DEM_00305282007054024 | 2007/5/28  | 6.95                                                          | 15.41  | 1.87      | 11.11   |
| AST14DEM_00305282007054033 | 2007/5/28  | 3.82                                                          | 19.15  | 1.45      | 13.57   |
| AST14DEM_00307312007054050 | 2007/7/31  | 5.36                                                          | 13.04  | 0.46      | 10.81   |
| AST14DEM_00307312007054059 | 2007/7/31  | -4.43                                                         | 20.39  | 0.29      | 16.90   |
| AST14DEM_00312222007054044 | 2007/12/22 | 13.10                                                         | 34.16  | 2.91      | 34.19   |
| AST14DEM_00312222007054035 | 2007/12/22 | 7.16                                                          | 27.50  | 1.17      | 25.25   |
| AST14DEM_00303112008054024 | 2008/3/11  | 4.73                                                          | 18.61  | 1.23      | 17.66   |
| AST14DEM_00310212008054055 | 2008/10/21 | 15.86                                                         | 34.07  | 2.32      | 29.81   |
| AST14DEM_00310212008054046 | 2008/10/21 | 11.57                                                         | 29.32  | 1.67      | 23.30   |
| AST14DEM_00311222008054054 | 2008/11/22 | 5.35                                                          | 23.63  | 2.19      | 17.27   |
| AST14DEM_00311222008054103 | 2008/11/22 | -1.95                                                         | 20.65  | 0.61      | 12.56   |
| AST14DEM_00304222009054745 | 2009/4/22  | 0.25                                                          | 15.74  | 0.15      | 14.47   |
| AST14DEM_00308212009054049 | 2009/8/21  | 14.31                                                         | 24.76  | 1.47      | 25.47   |
| AST14DEM_00310312009054651 | 2009/10/31 | -2.87                                                         | 12.05  | 0.03      | 12.03   |
| AST14DEM_00312022009054657 | 2009/12/2  | -6.11                                                         | 10.54  | -0.29     | 10.16   |
| AST14DEM_00302042010054646 | 2010/2/4   | 2.93                                                          | 14.40  | 0.22      | 13.04   |
| AST14DEM_00304092010054648 | 2010/4/9   | 0.41                                                          | 11.45  | 0.23      | 11.19   |
| AST14DEM_00309162010054631 | 2010/9/16  | -7.54                                                         | 17.59  | 0.36      | 12.60   |
| AST14DEM_00301312011054004 | 2011/1/31  | 1.23                                                          | 36.38  | 1.12      | 36.21   |
| AST14DEM_00305072011054026 | 2011/5/7   | -0.05                                                         | 15.98  | 1.40      | 11.38   |
| AST14DEM_00305072011054035 | 2011/5/7   | -1.23                                                         | 16.69  | 1.05      | 11.28   |
| AST14DEM_00306082011054011 | 2011/6/8   | 2.02                                                          | 16.91  | 0.57      | 10.48   |
| AST14DEM_00306082011054020 | 2011/6/8   | -1.76                                                         | 20.46  | 0.66      | 12.68   |
| AST14DEM_00306242011054010 | 2011/6/24  | 7.52                                                          | 11.04  | 0.43      | 9.75    |
| AST14DEM_00306242011054019 | 2011/6/24  | 6.05                                                          | 13.47  | 0.42      | 12.25   |
| AST14DEM_00303222012054024 | 2012/3/22  | 16.75                                                         | 18.58  | 1.08      | 15.76   |
| AST14DEM_00304142012054630 | 2012/4/14  | 5.09                                                          | 12.00  | -0.01     | 11.98   |
| AST14DEM_00304232012054026 | 2012/4/23  | 24.93                                                         | 25.85  | 0.56      | 18.77   |
| AST14DEM_00304232012054035 | 2012/4/23  | 22.34                                                         | 26.47  | 1.61      | 18.00   |
| AST14DEM_00305092012054029 | 2012/5/9   | 22.08                                                         | 15.37  | 0.77      | 14.42   |
| AST14DEM_00305162012054638 | 2012/5/16  | -3.34                                                         | 12.41  | 0.37      | 12.41   |
| AST14DEM_00307032012054636 | 2012/7/3   | 2.25                                                          | 20.88  | 0.83      | 13.61   |
| AST14DEM_00310192013054017 | 2013/10/19 | 10.42                                                         | 26.29  | 1.73      | 26.26   |
| AST14DEM_00310192013054025 | 2013/10/19 | 9.61                                                          | 32.00  | 1.92      | 32.61   |
| AST14DEM_00308192014054100 | 2014/8/19  | 3.18                                                          | 13.31  | 1.28      | 11.28   |
| AST14DEM_00308192014054109 | 2014/8/19  | -3.94                                                         | 16.42  | 0.24      | 13.67   |
| AST14DEM_00302112015054102 | 2015/2/11  | 0.33                                                          | 22.80  | 2.17      | 22.58   |
| AST14DEM_00309142015054723 | 2015/9/14  | -2.00                                                         | 12.47  | -0.38     | 11.01   |
| AST14DEM_00312032015054715 | 2015/12/3  | -16.50                                                        | 16.77  | 0.15      | 14.23   |
| AST14DEM_00303082016054644 | 2016/3/8   | -15.78                                                        | 12.98  | 0.13      | 11.16   |
| AST14DEM_00303242016054647 | 2016/3/24  | -4.81                                                         | 11.14  | -0.17     | 10.29   |
| AST14DEM_00305142017054652 | 2017/5/14  | -4.65                                                         | 16.58  | 0.68      | 13.52   |
| AST14DEM_00305302017054652 | 2017/5/30  | 2.48                                                          | 25.14  | 1.48      | 23.46   |
| AST14DEM_00312082017054653 | 2017/12/8  | -1.20                                                         | 11.05  | 0.62      | 10.62   |

|                                                                  |            |        |       |       |       |
|------------------------------------------------------------------|------------|--------|-------|-------|-------|
| AST14DEM_00305262018054155                                       | 2018/5/26  | 23.48  | 27.18 | 1.14  | 16.29 |
| AST14DEM_00305262018054204                                       | 2018/5/26  | 14.95  | 37.11 | 2.15  | 27.27 |
| AST14DEM_00305292019054059                                       | 2019/5/29  | -0.59  | 20.11 | 1.78  | 13.31 |
| AST14DEM_00305292019054050                                       | 2019/5/29  | 2.80   | 16.35 | 0.98  | 11.29 |
| AST14DEM_00303032020054720                                       | 2020/3/3   | -6.98  | 16.32 | 0.50  | 15.50 |
| AST14DEM_00306232020054643                                       | 2020/6/23  | 1.61   | 21.38 | 0.42  | 14.60 |
| AST14DEM_00305092021054453                                       | 2021/5/9   | 2.23   | 23.64 | 1.38  | 19.16 |
| AST14DEM_00306032021053822                                       | 2021/6/3   | 17.21  | 30.01 | 1.65  | 16.08 |
| AST14DEM_00306032021053813                                       | 2021/6/3   | 20.40  | 22.97 | 1.69  | 12.77 |
| AST14DEM_00309302021054225                                       | 2021/9/30  | 7.32   | 20.55 | 0.29  | 11.77 |
| HMA_DEM8m_AT_20110625_0602_1030<br>01000B995100_103001000B62DE00 | 2011/6/25  | -21.39 | 6.03  | 0.22  | 5.79  |
| HMA_DEM8m_AT_20110625_0602_1030<br>01000C6D7F00_103001000B48A500 | 2011/6/25  | -18.53 | 5.80  | 0.14  | 5.52  |
| HMA_DEM8m_AT_20120817_0555_1030<br>01001ABA5800_103001001BA72400 | 2012/8/17  | -17.38 | 5.67  | 0.15  | 5.54  |
| HMA_DEM8m_AT_20121002_0548_1020<br>01001D519C00_102001001E5C8700 | 2012/10/2  | -14.10 | 6.11  | 0.22  | 6.02  |
| HMA_DEM8m_AT_20130121_0537_1020<br>01001E3AD500_102001001FD84200 | 2013/1/21  | -17.31 | 6.10  | 0.32  | 5.92  |
| HMA_DEM8m_AT_20150321_0533_1040<br>01000970E100_1040010009200000 | 2015/3/21  | -18.94 | 6.08  | 0.23  | 5.67  |
| HMA_DEM8m_AT_20150409_0533_1040<br>01000A61D300_104001000A3BBC00 | 2015/4/9   | -17.32 | 5.58  | 0.28  | 5.42  |
| HMA_DEM8m_AT_20150409_0534_1040<br>01000A8D7900_104001000955A900 | 2015/4/9   | -17.53 | 5.09  | 0.20  | 5.00  |
| HMA_DEM8m_AT_20150507_0542_1050<br>410012A5C000_1050410012A5BF00 | 2015/5/7   | -18.71 | 6.30  | 0.20  | 5.84  |
| HMA_DEM8m_AT_20150523_0550_1030<br>010042AEB200_103001004177F700 | 2015/5/23  | -22.85 | 5.52  | 0.11  | 5.38  |
| HMA_DEM8m_AT_20151016_0545_1040<br>010012C70E00_104001001380D500 | 2015/10/16 | -16.57 | 5.75  | 0.26  | 5.35  |
| HMA_DEM8m_AT_20151128_0742_1020<br>0100481CBF00_10200100470C5800 | 2015/11/28 | -19.96 | 7.63  | -0.03 | 7.38  |
| HMA_DEM8m_AT_20160730_0547_1030<br>010058028600_103001005A695500 | 2016/7/30  | -18.66 | 5.70  | 0.15  | 5.55  |
| HMA_DEM8m_AT_20161002_0535_1050<br>010006818700_1050010006818900 | 2016/10/2  | -17.75 | 5.41  | 0.10  | 5.13  |
| HMA_DEM8m_AT_20161002_0534_1050<br>010006818800_1050010006818600 | 2016/10/2  | -19.26 | 6.36  | 0.23  | 5.79  |
| HMA_DEM8m_CT_20141025_1736_1040<br>010003AC5200_10300100388CC800 | 2014/10/25 | -11.83 | 6.61  | 0.02  | 6.50  |
| HMA_DEM8m_CT_20141129_1801_1030<br>01003CC3F400_1020010038C4A900 | 2014/11/29 | -17.98 | 6.11  | 0.20  | 5.83  |

---

**Figure S1.** Sharpened Landsat images showing ice-dammed lake evolution (1).

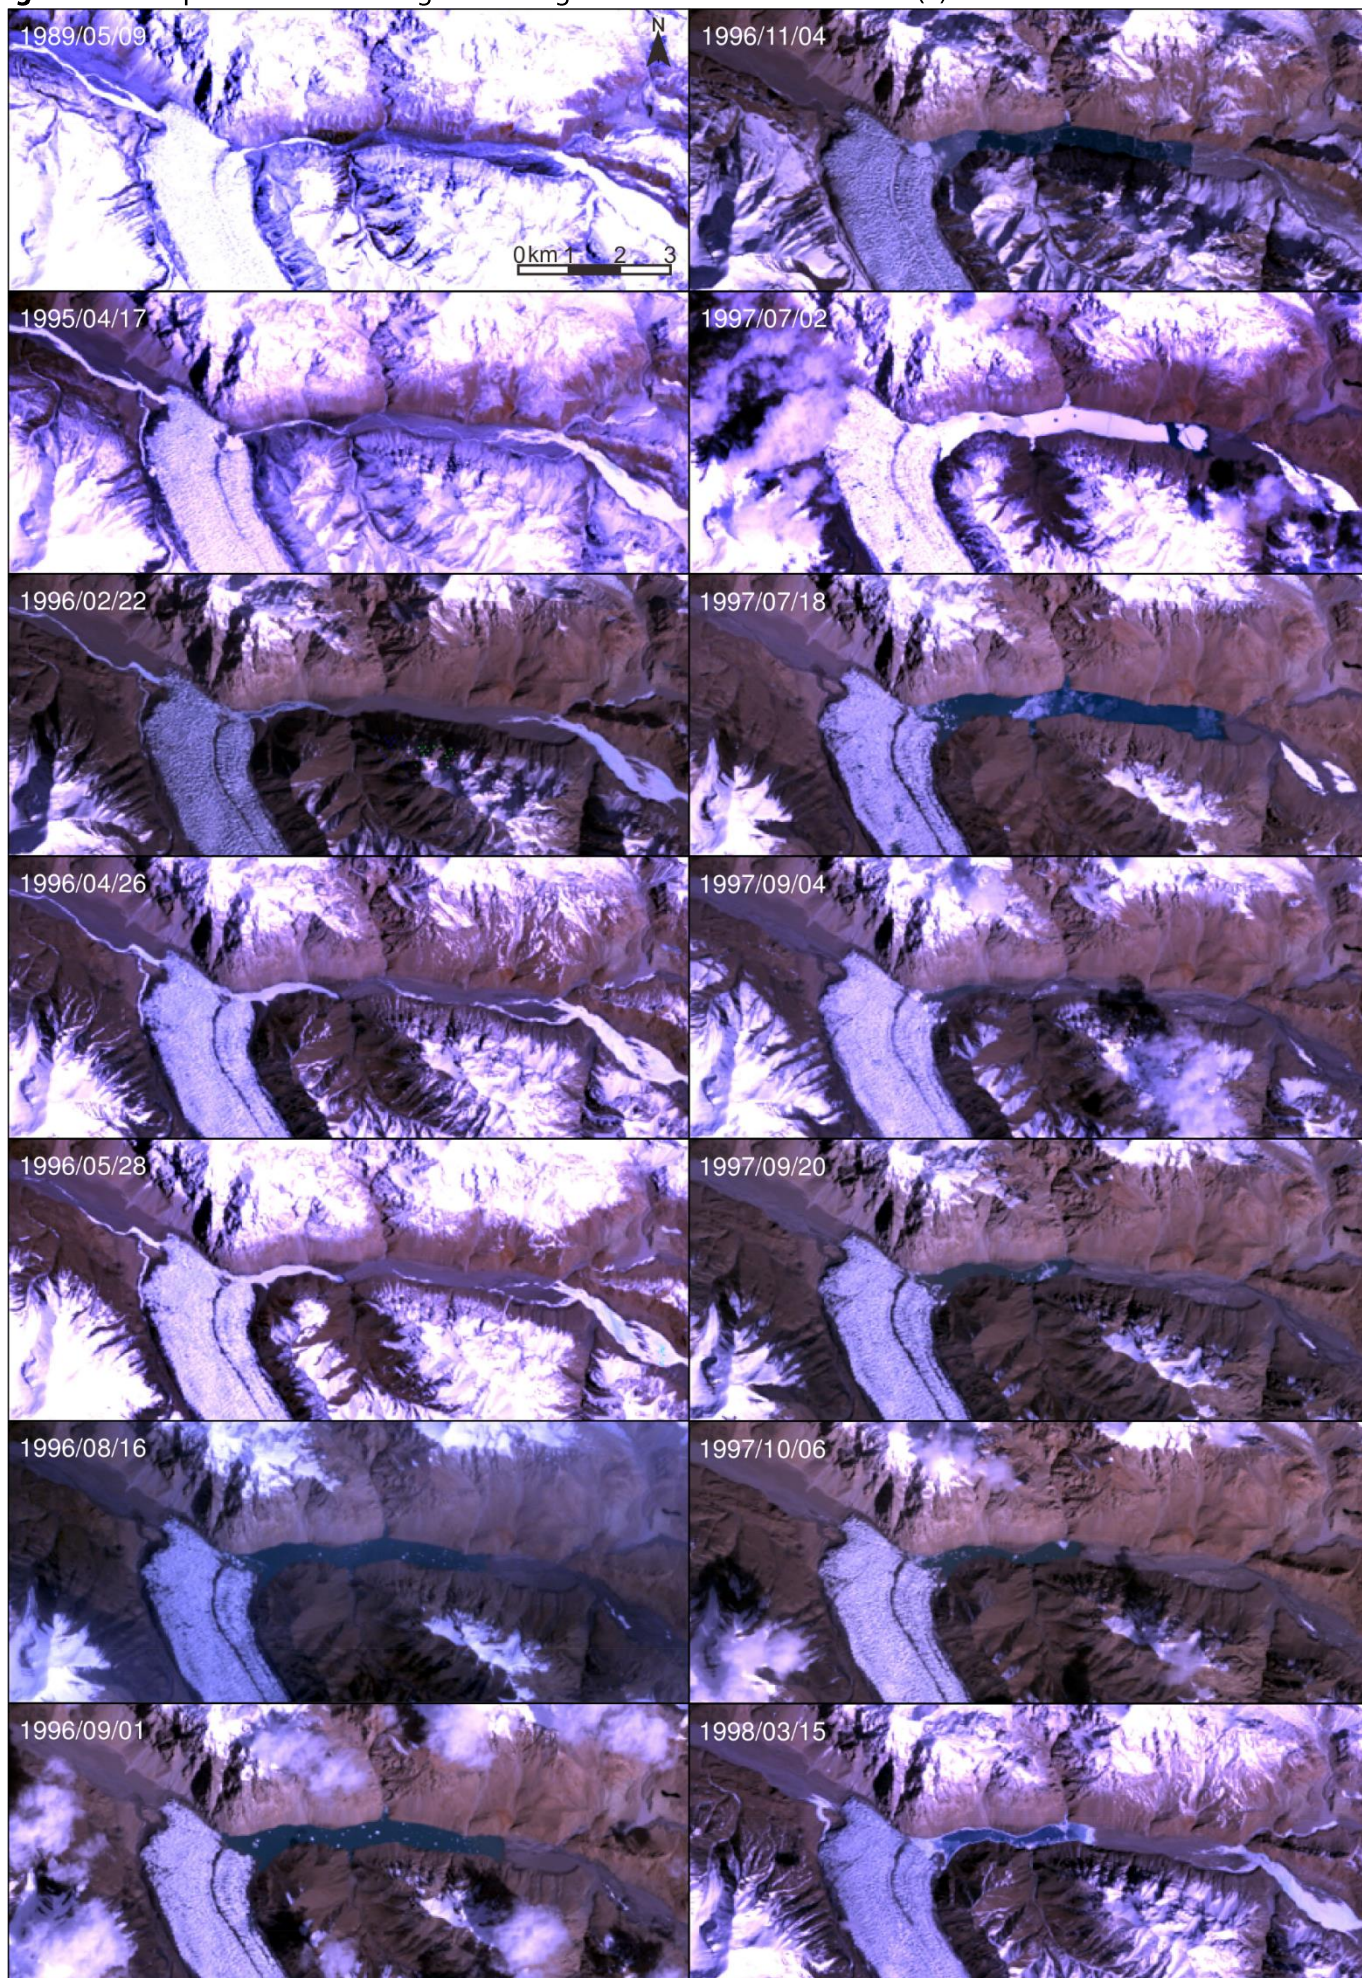

**Figure S2.** Sharpened Landsat images showing ice-dammed lake evolution (2).

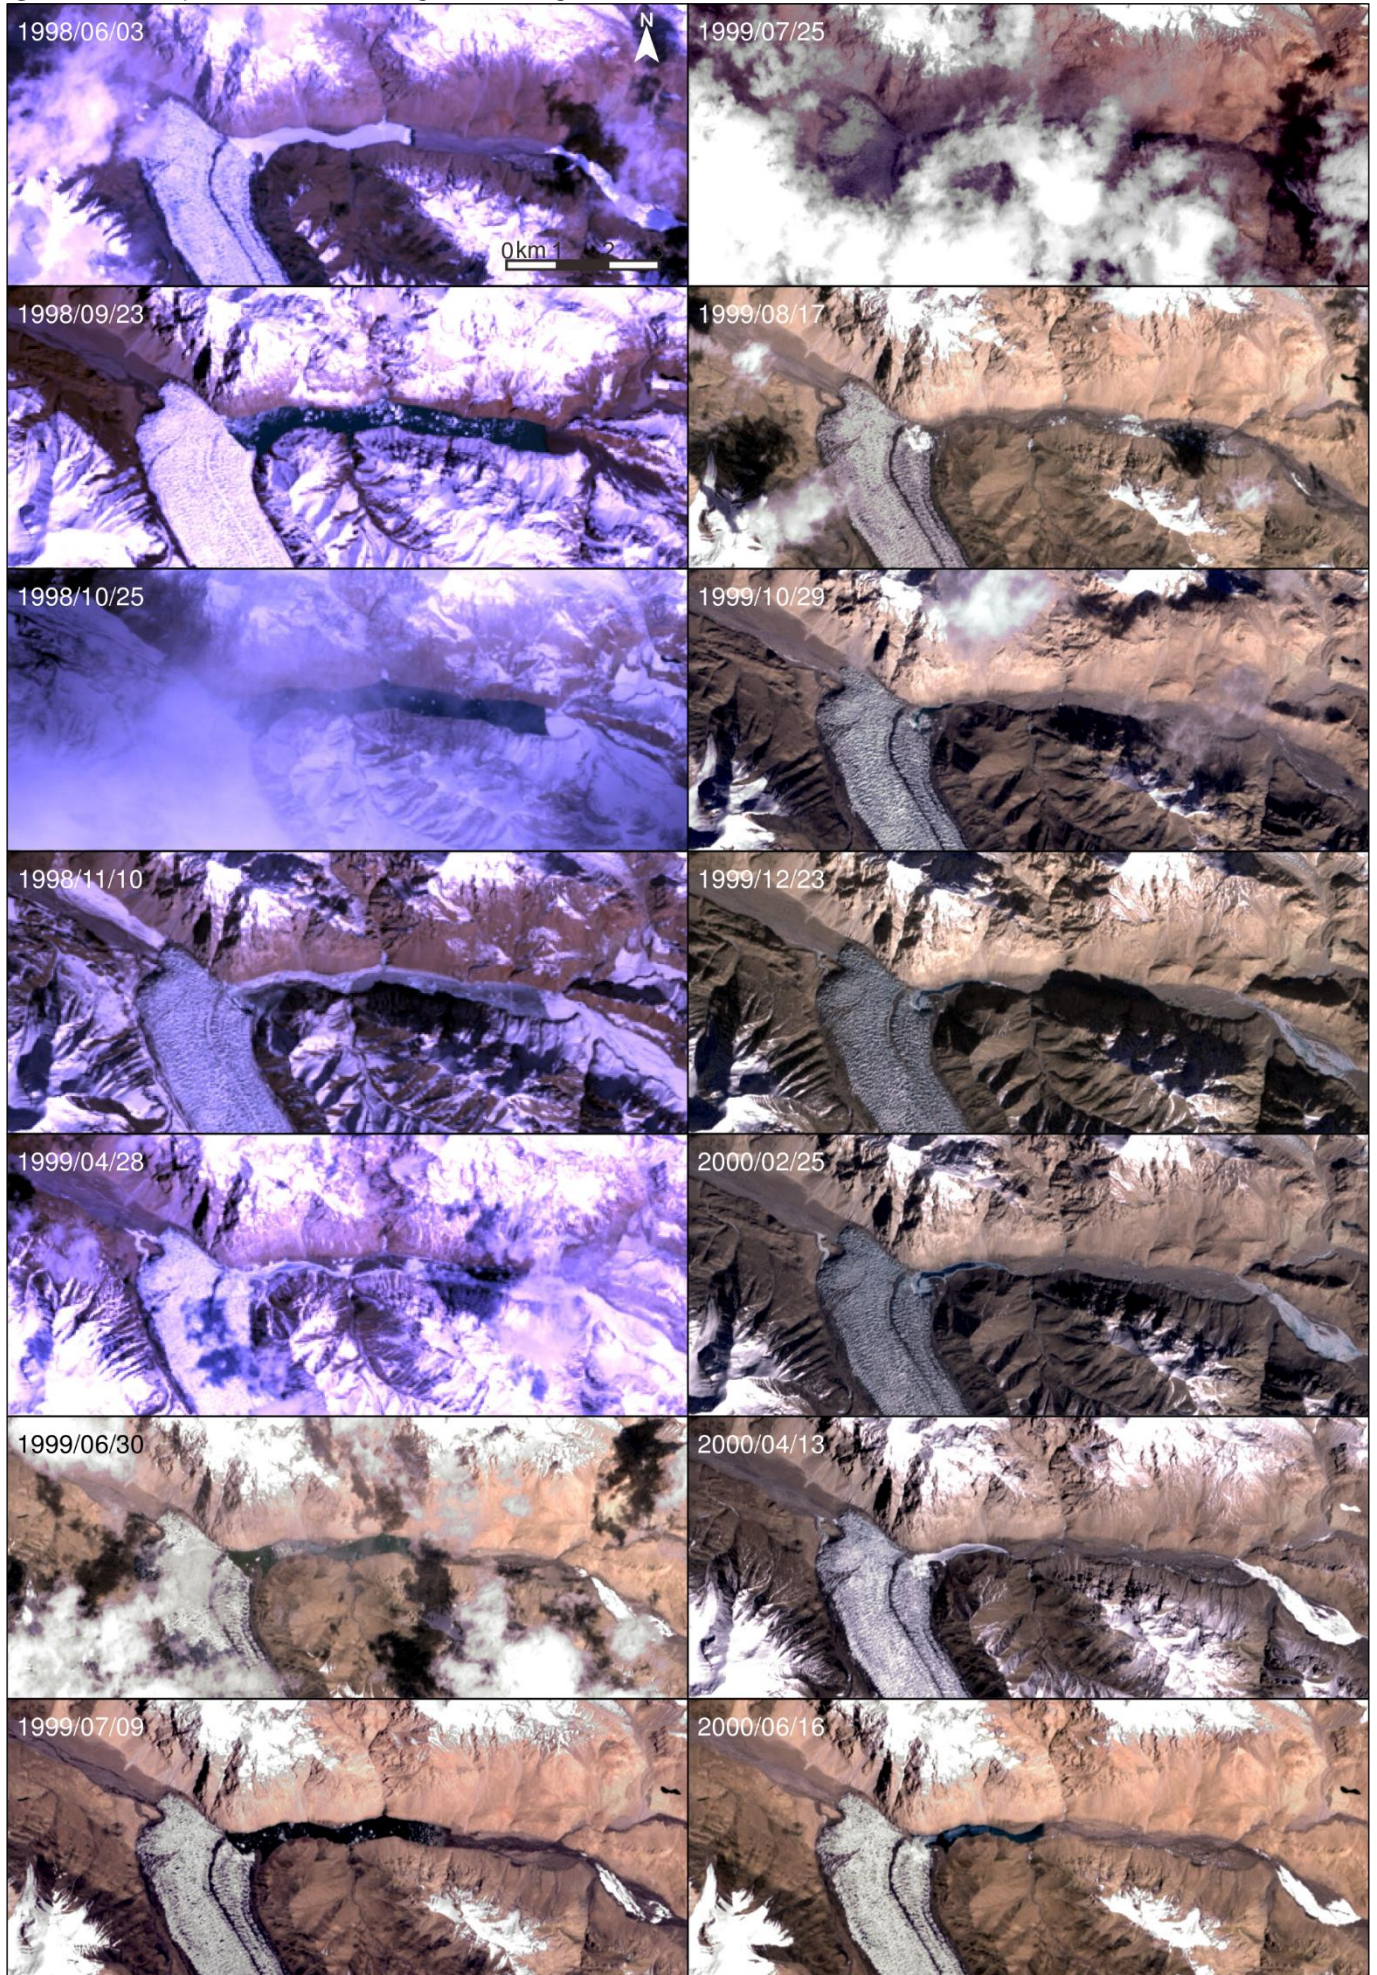

**Figure S3.** Sharpened Landsat images showing ice-dammed lake evolution (3).

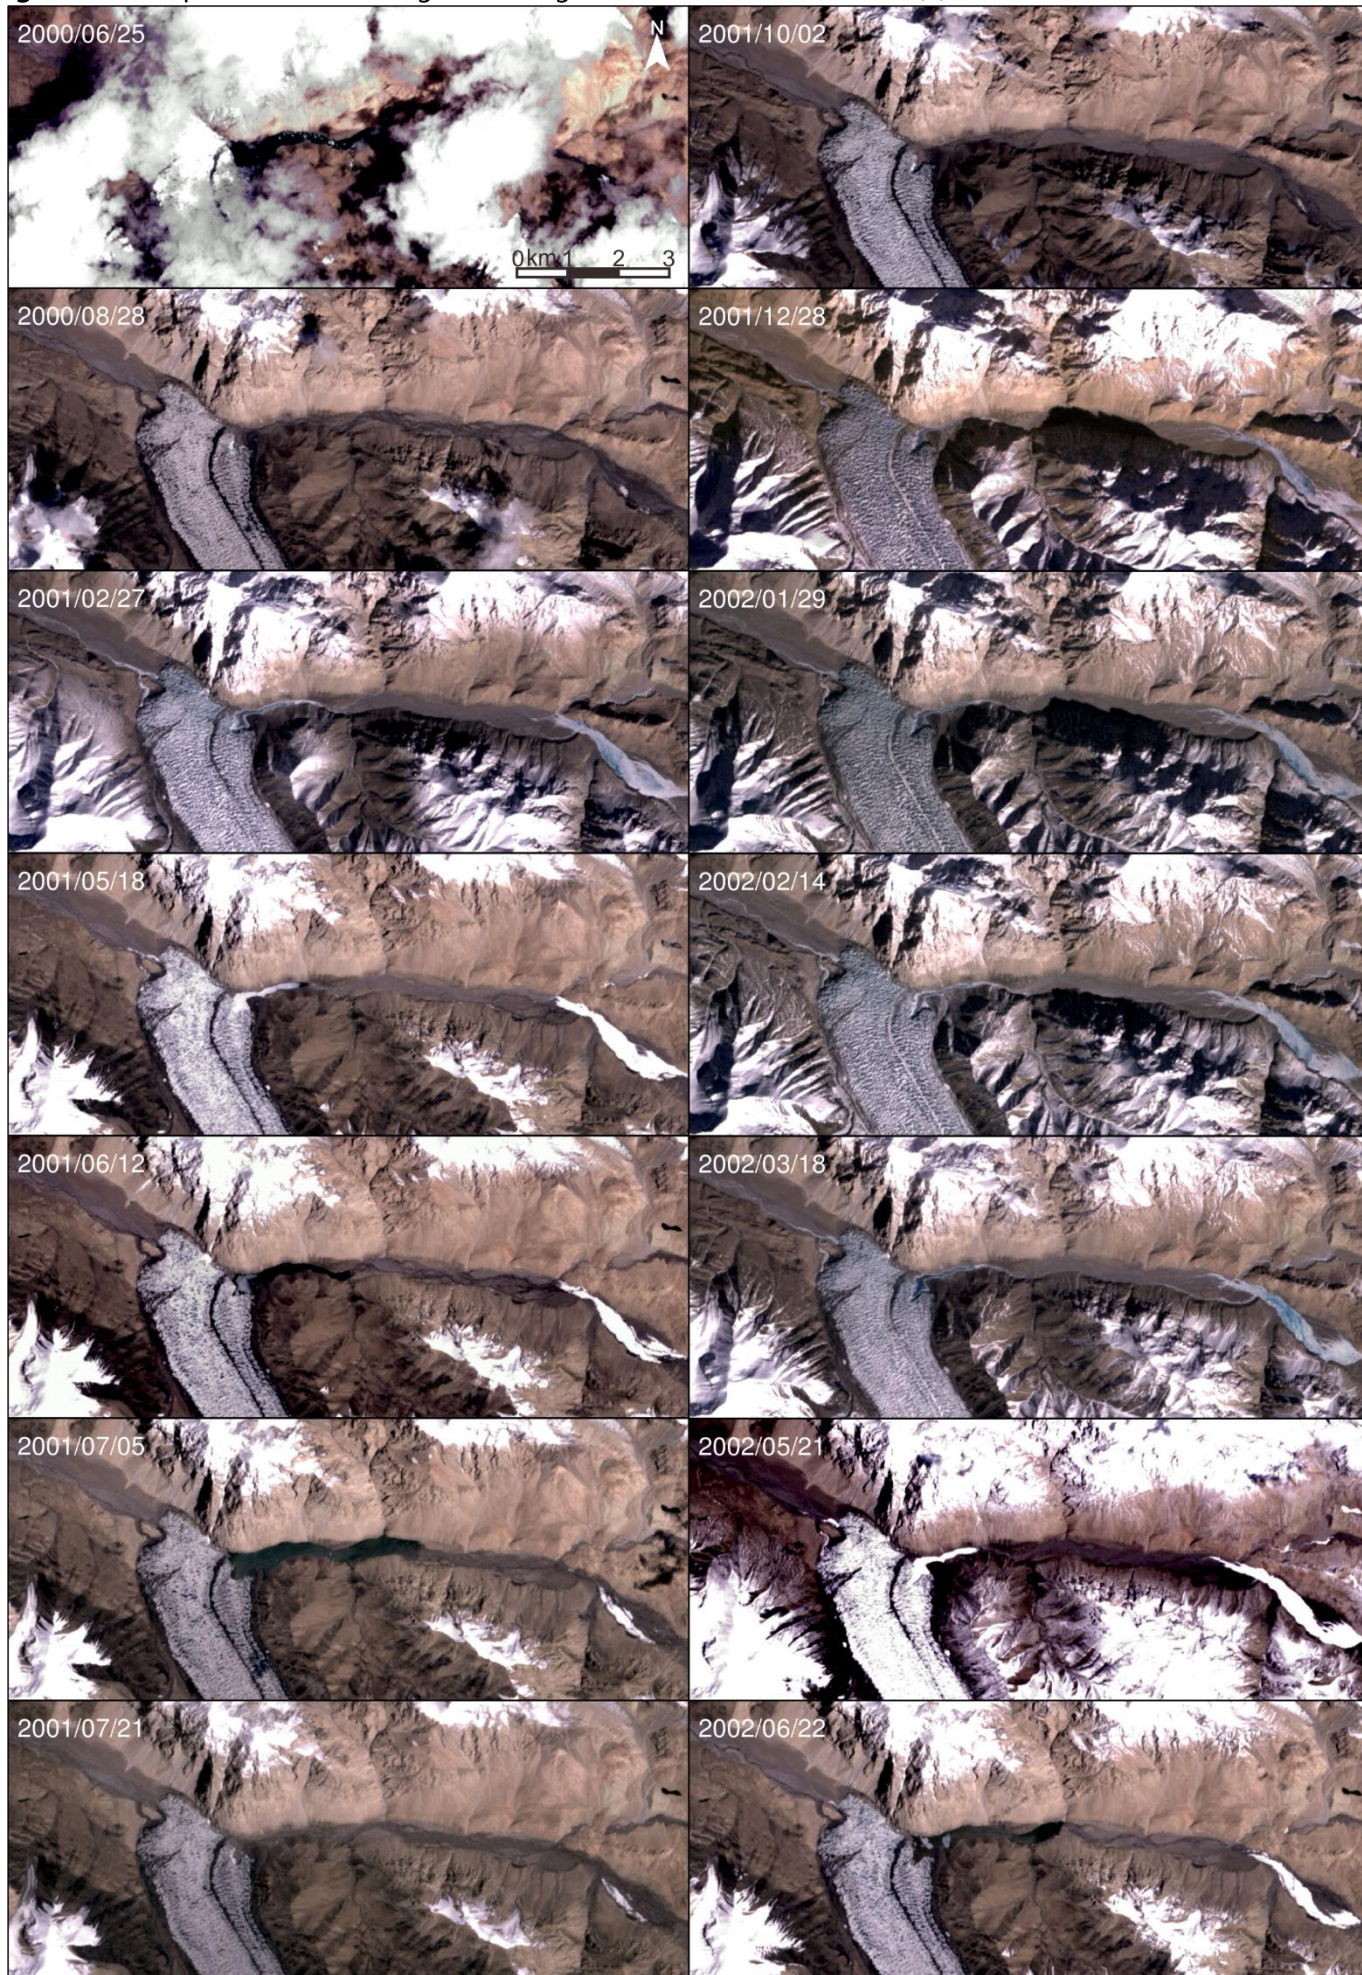

**Figure S4.** Sharpened Landsat images showing ice-dammed lake evolution (4).

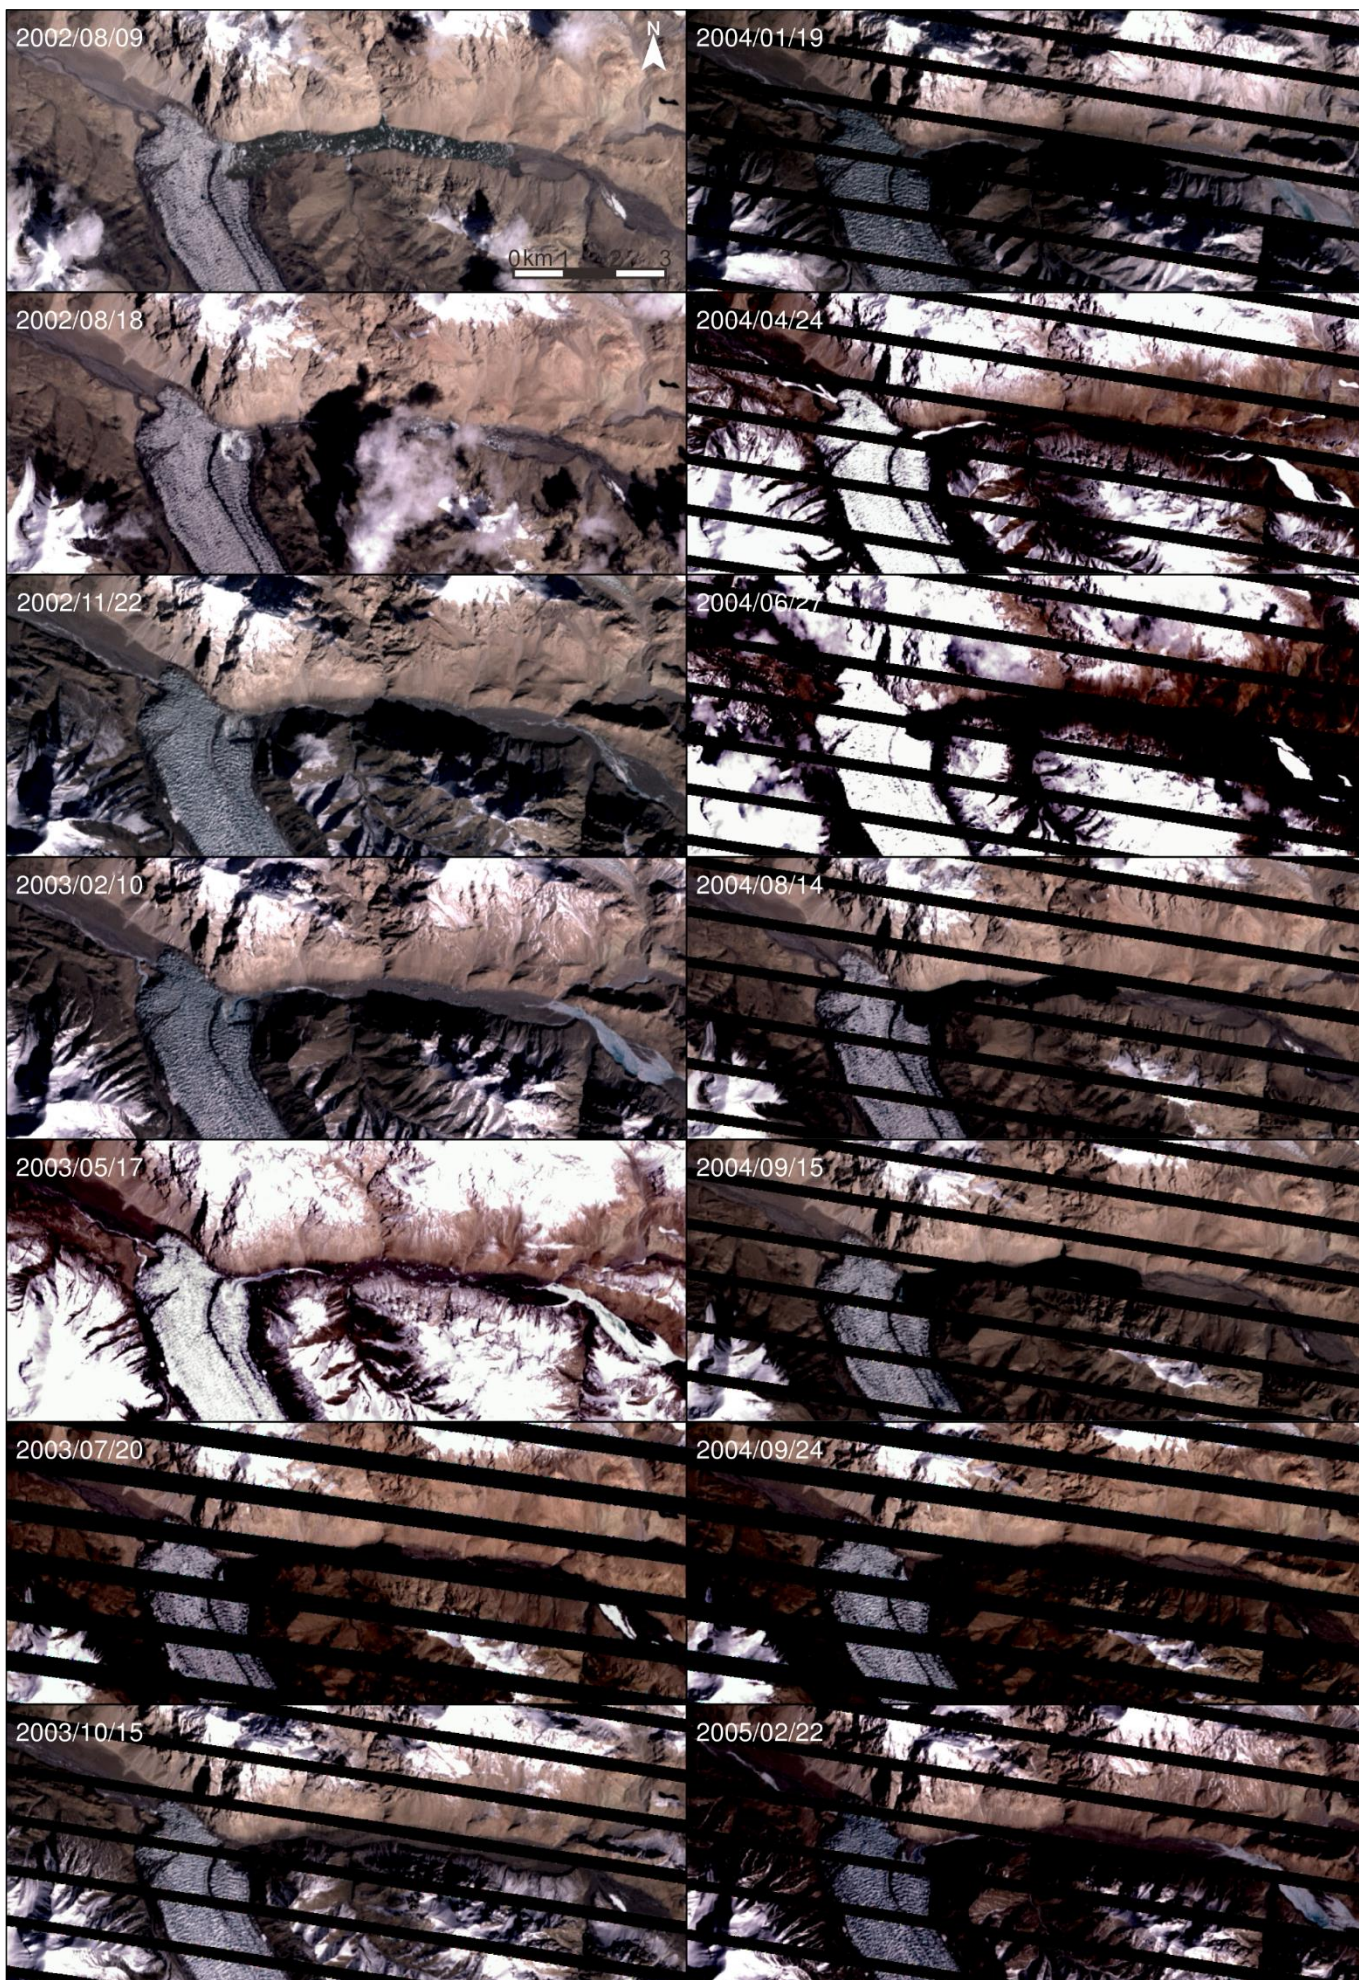

**Figure S5.** Sharpened Landsat images showing ice-dammed lake evolution (5).

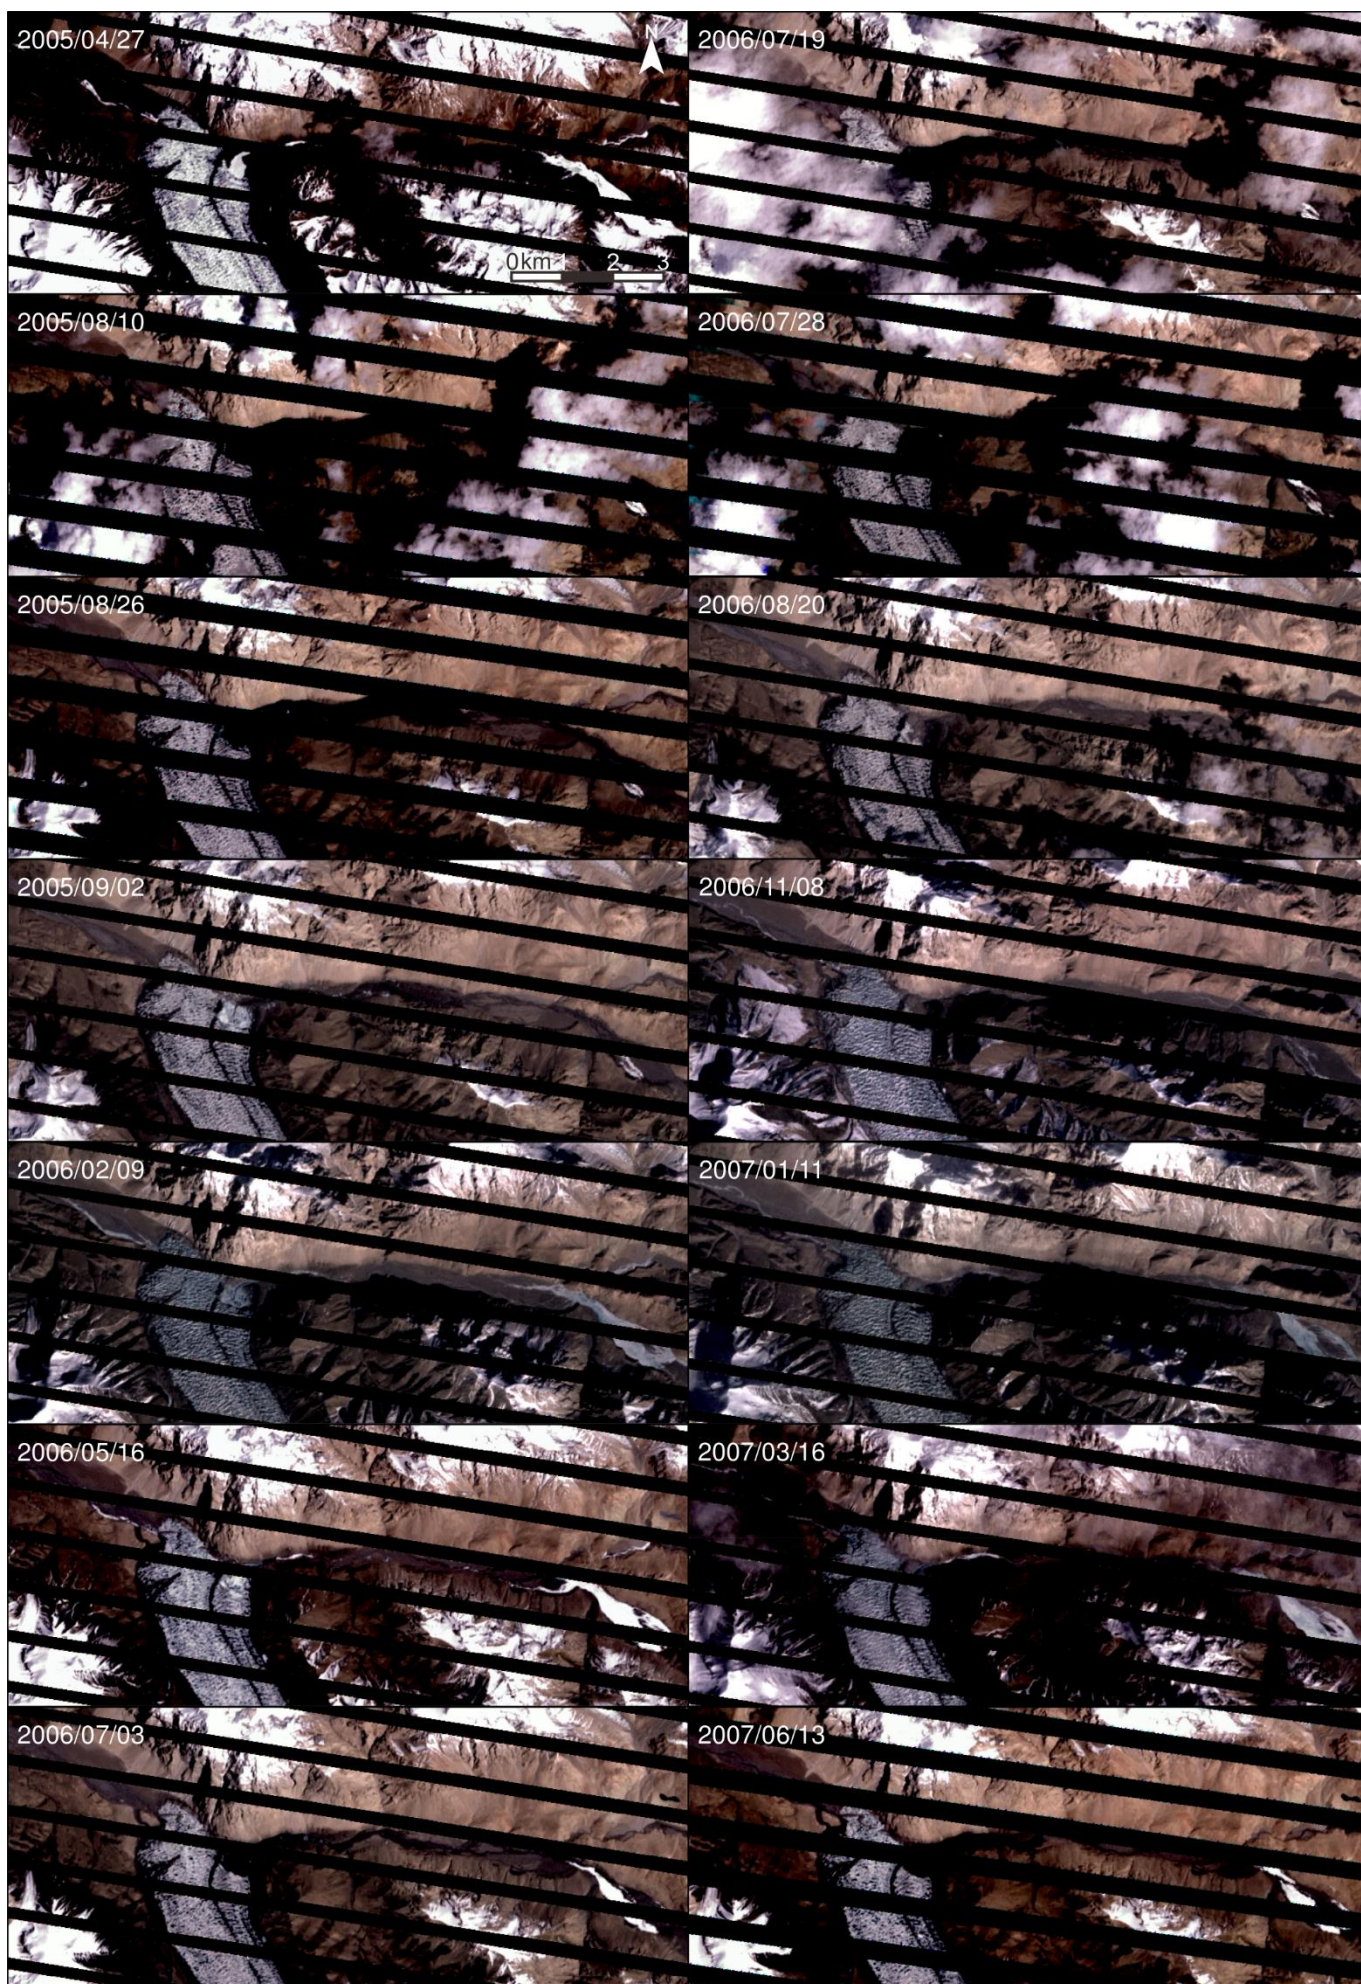

**Figure S6.** Sharpened Landsat images showing ice-dammed lake evolution (6).

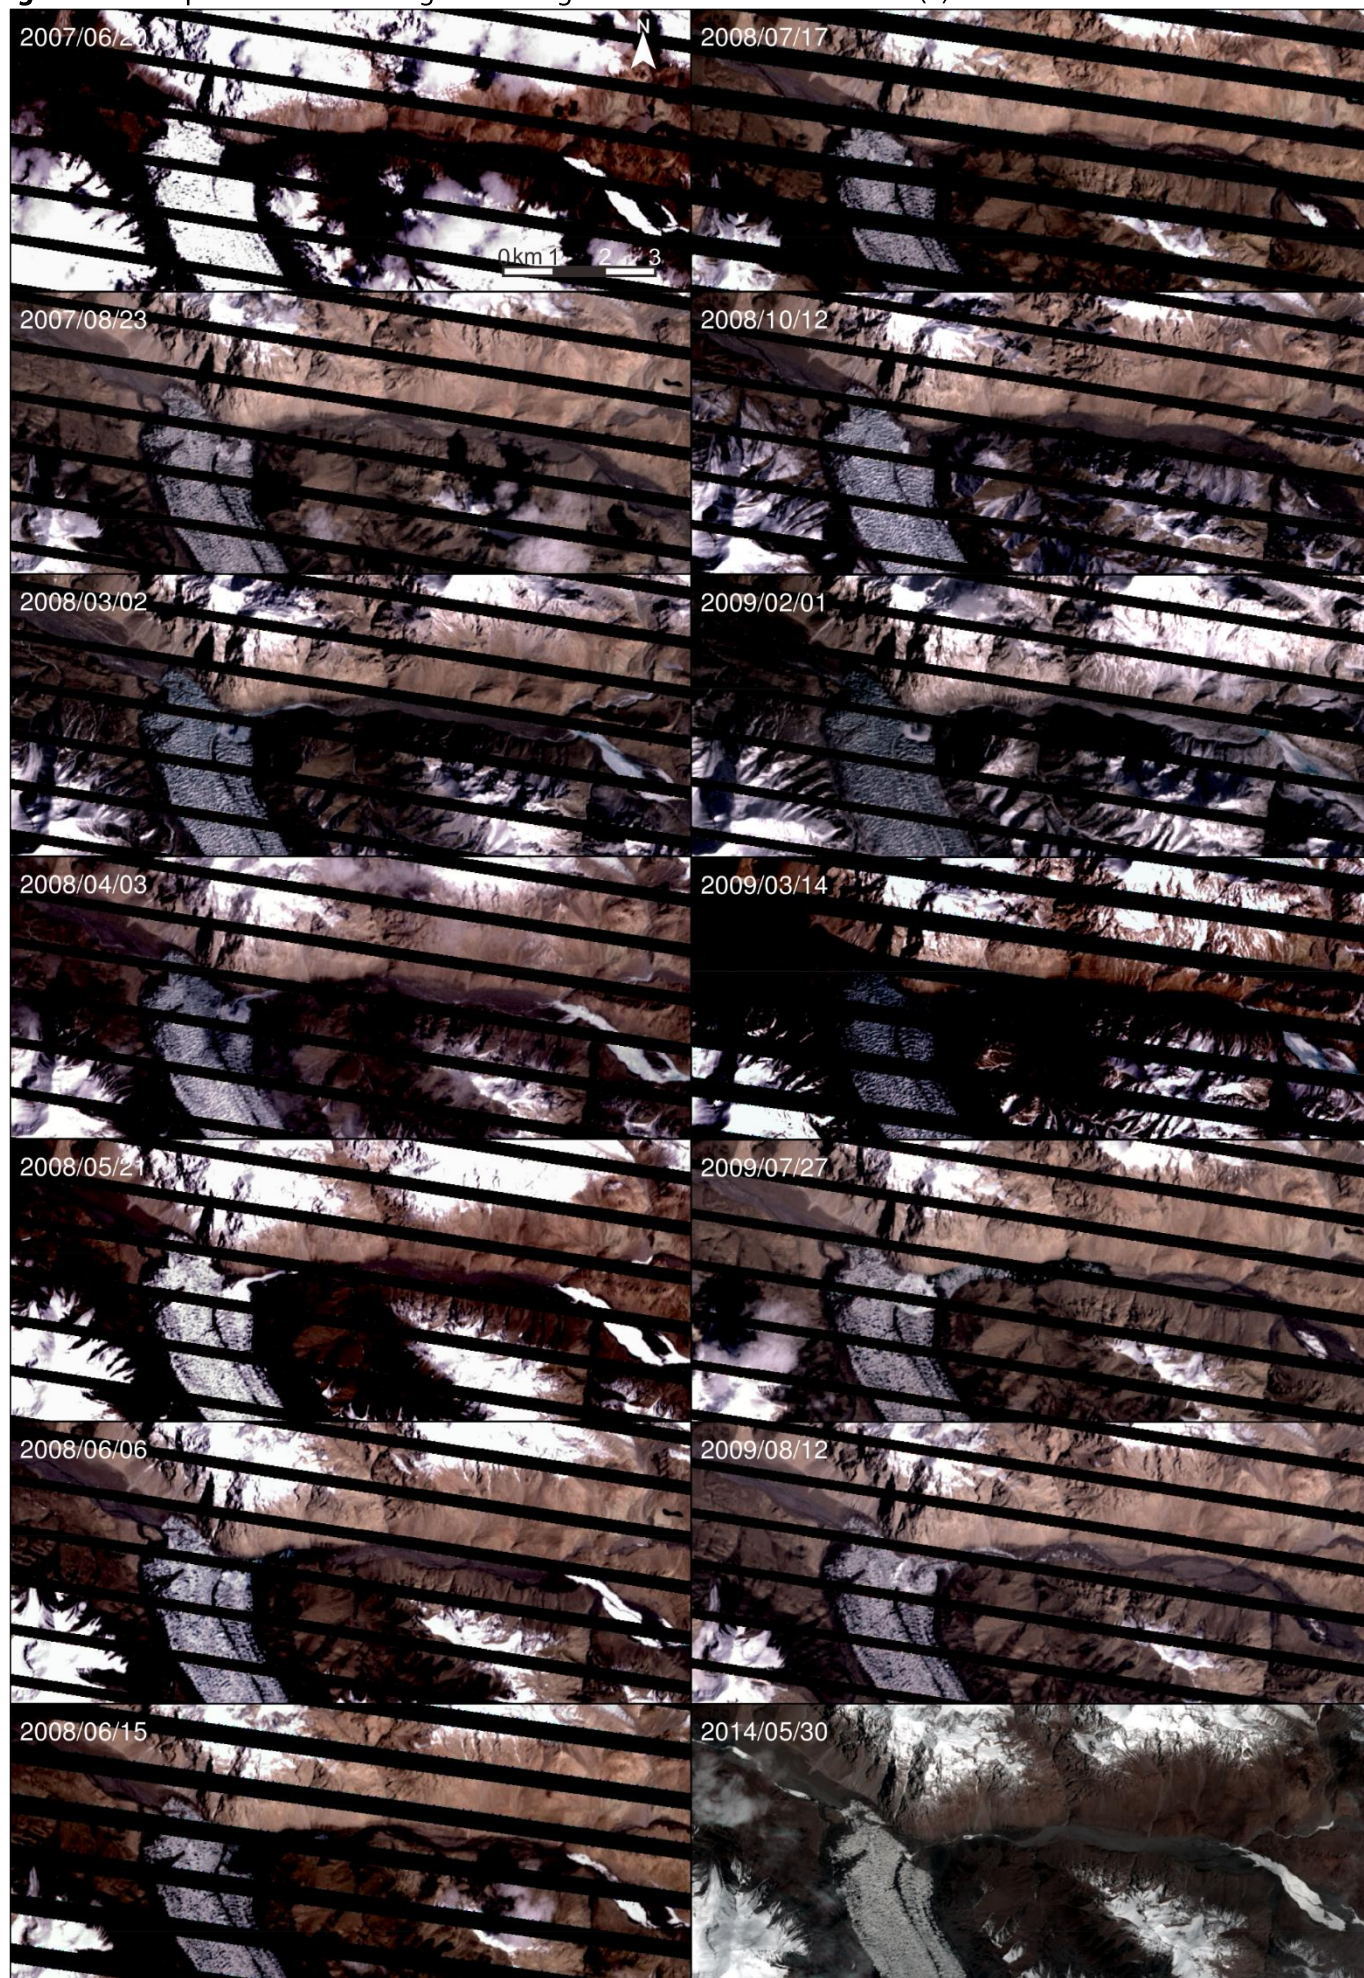



**Figure S7.** Sharpened Landsat images showing ice-dammed lake evolution (7).

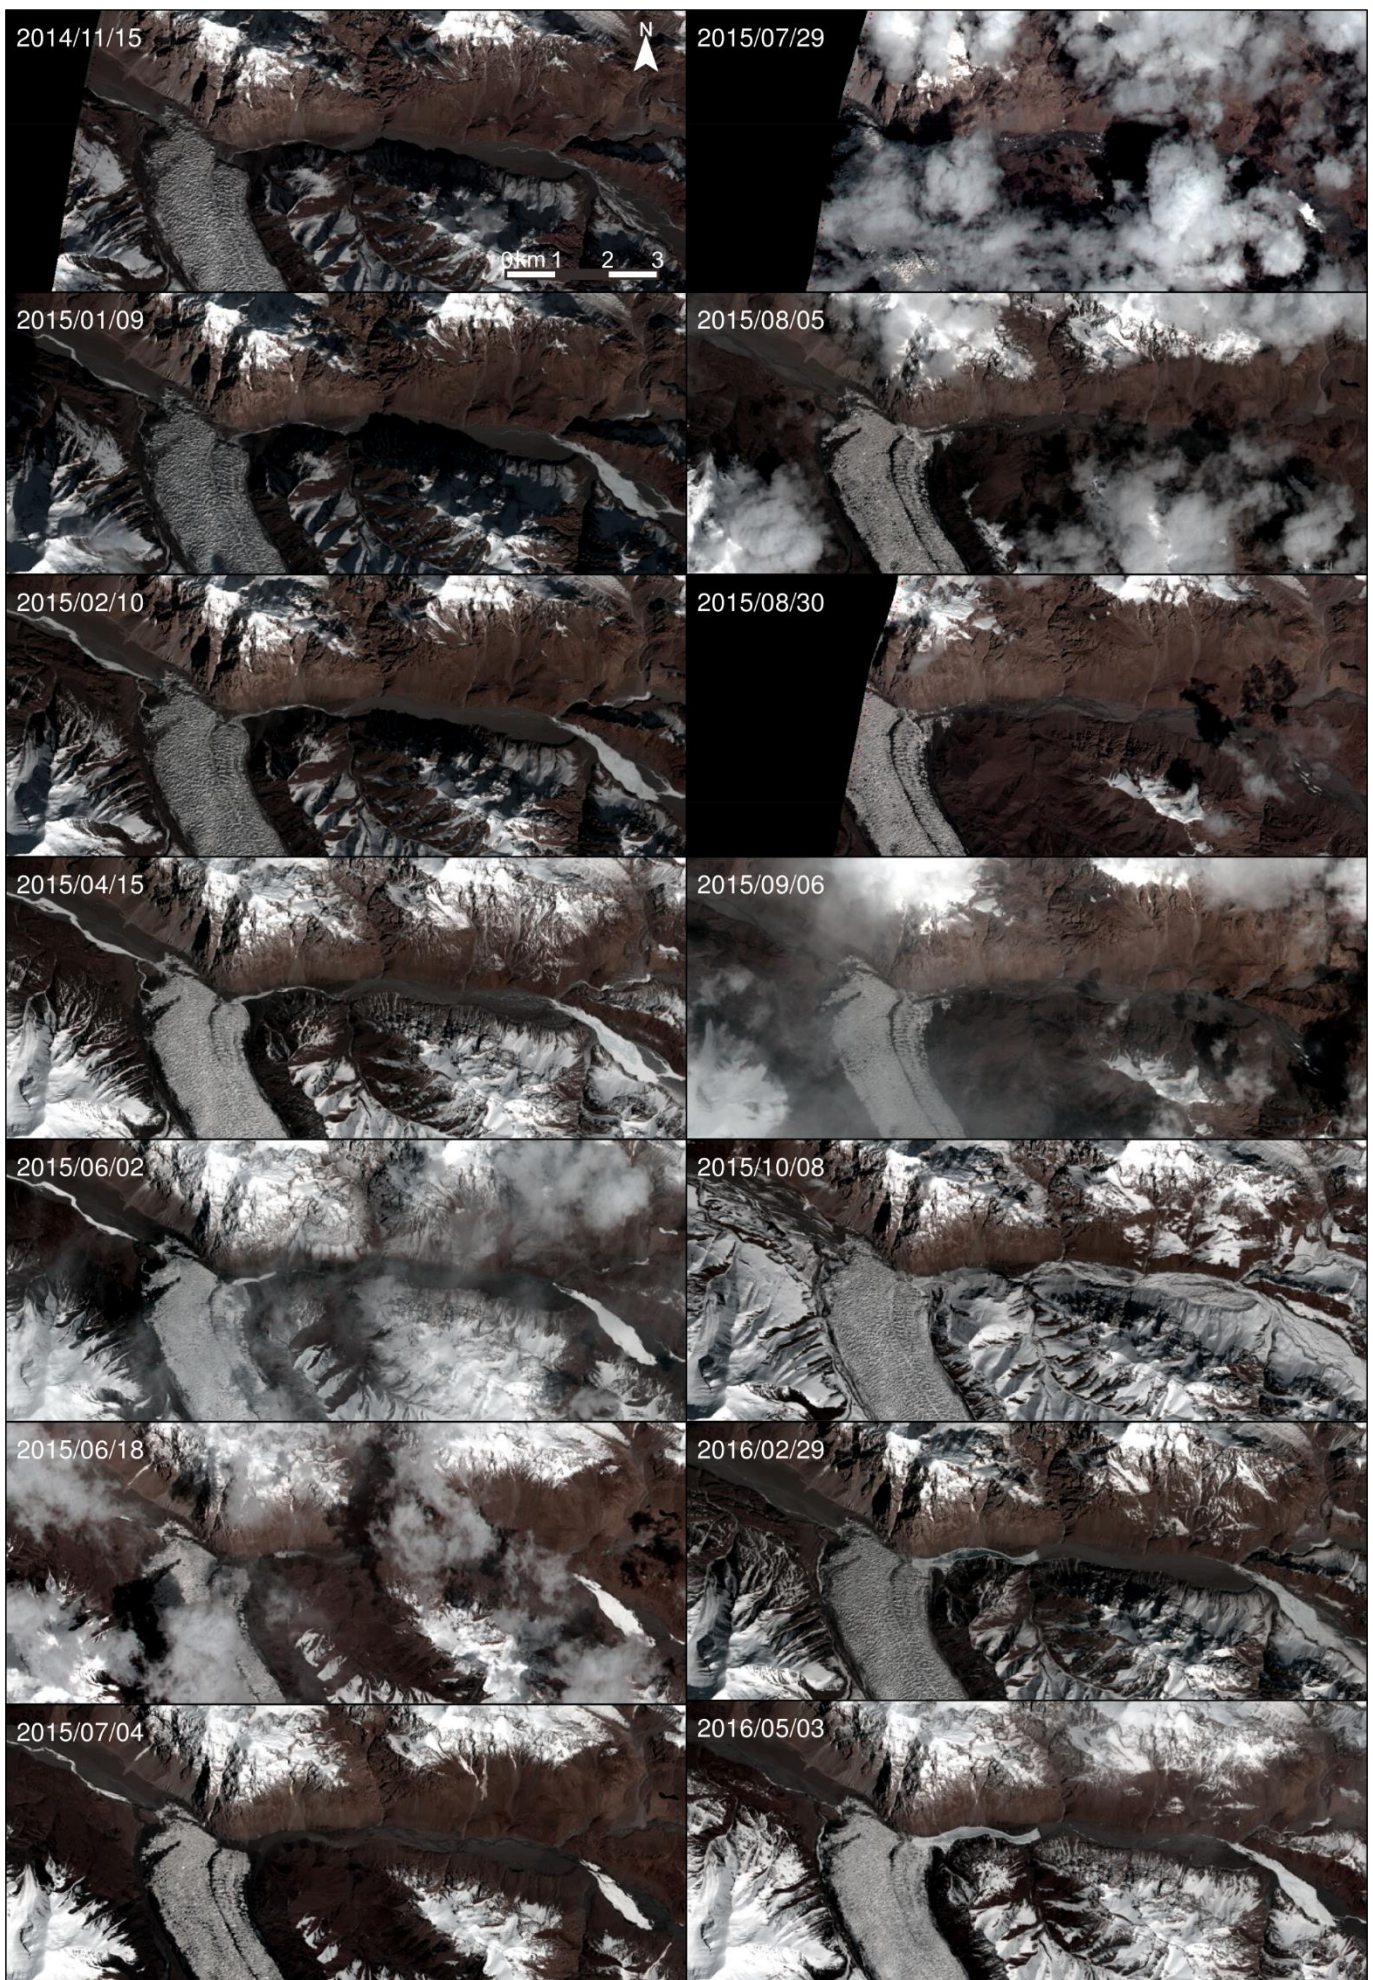

**Figure S8.** Sharpened Landsat images showing ice-dammed lake evolution (8).

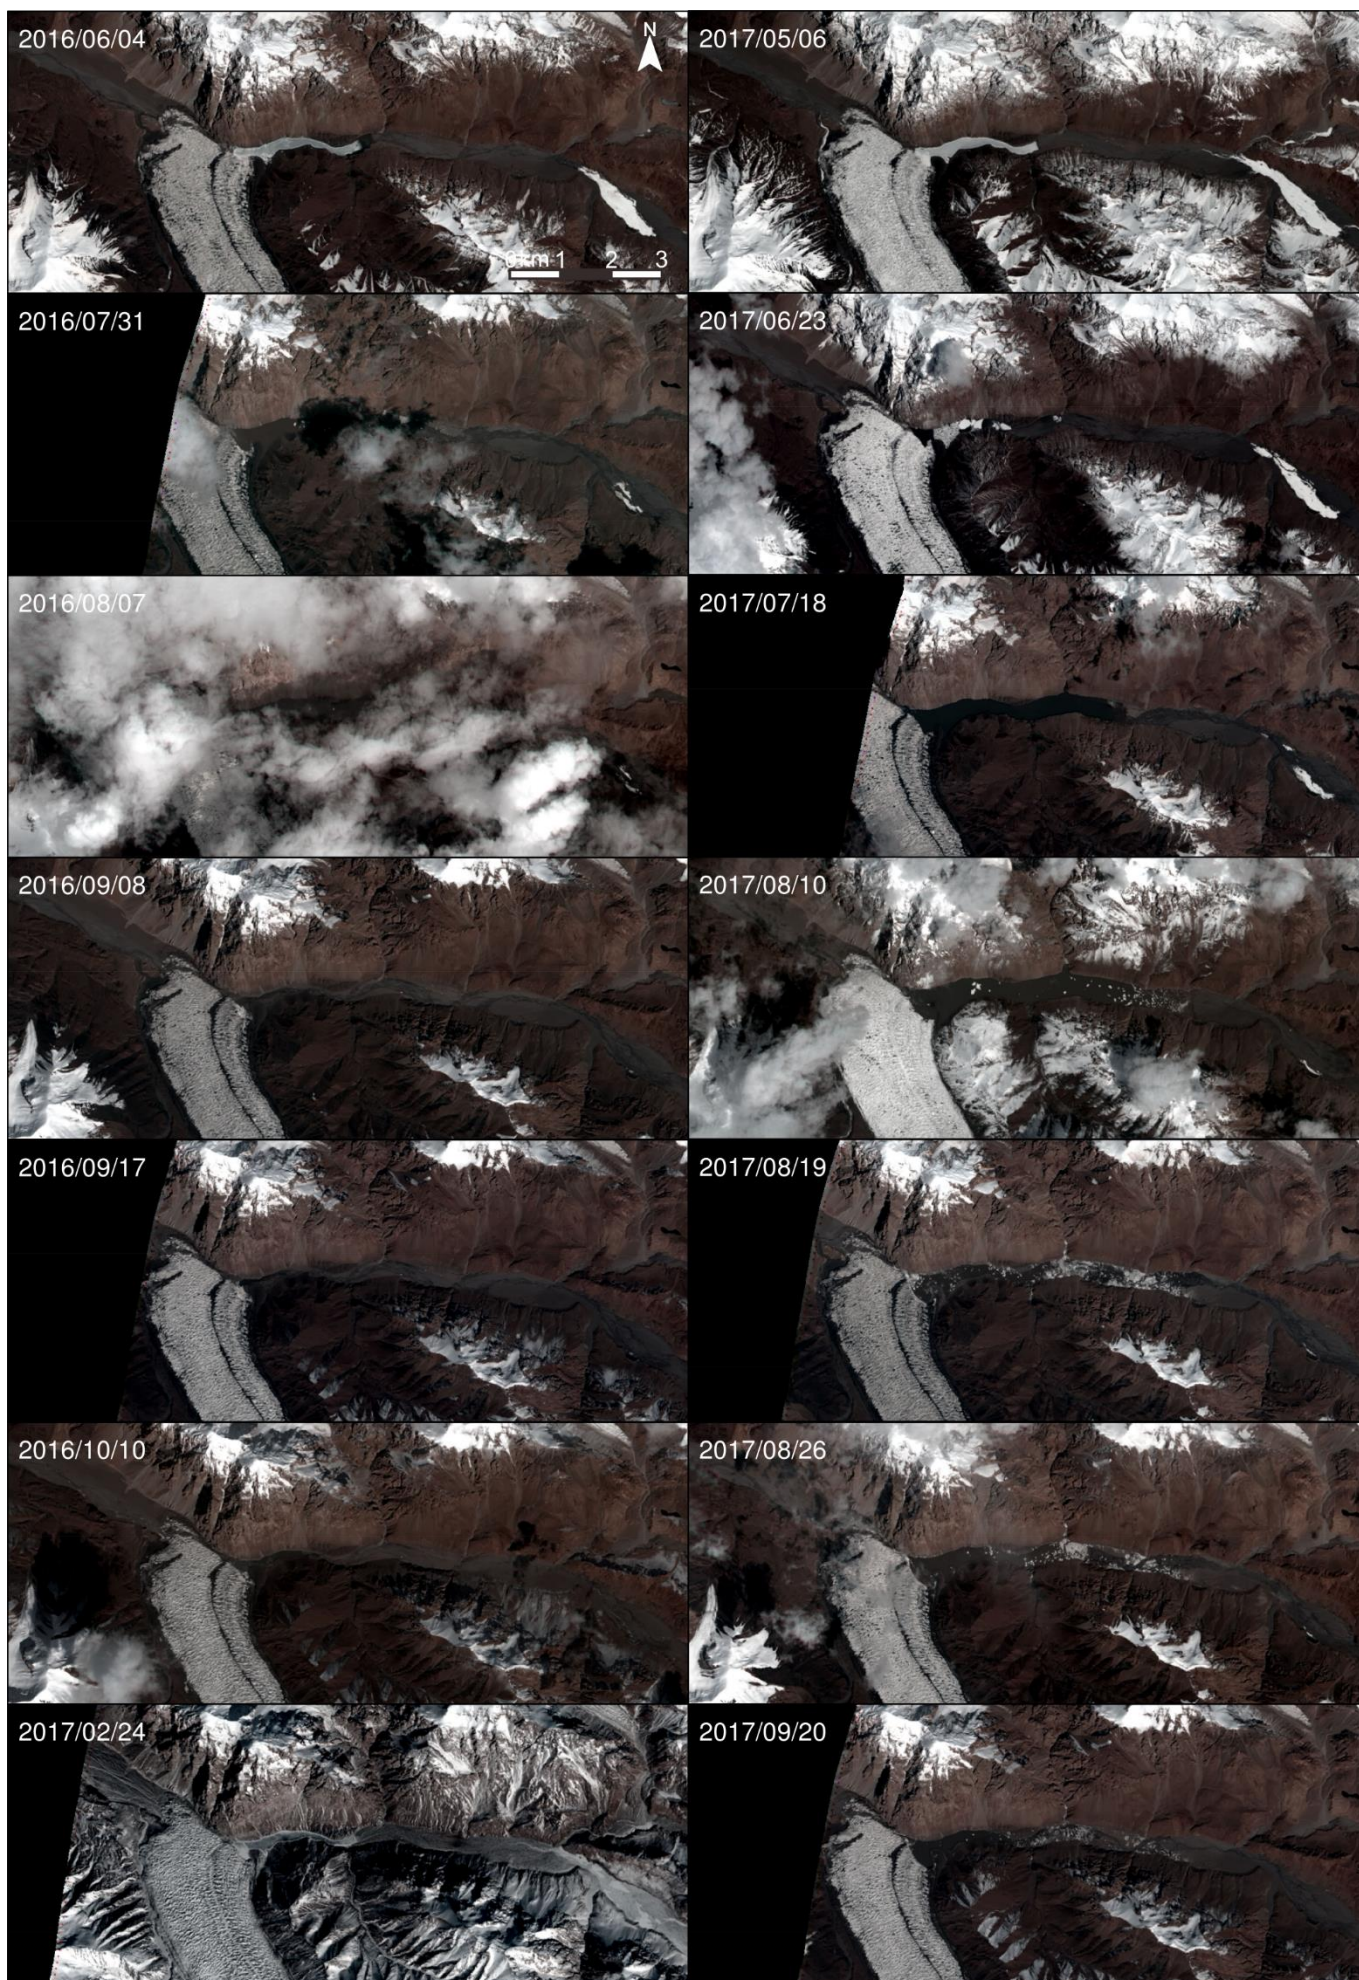

**Figure S9.** Sharpened Landsat images showing ice-dammed lake evolution (9).

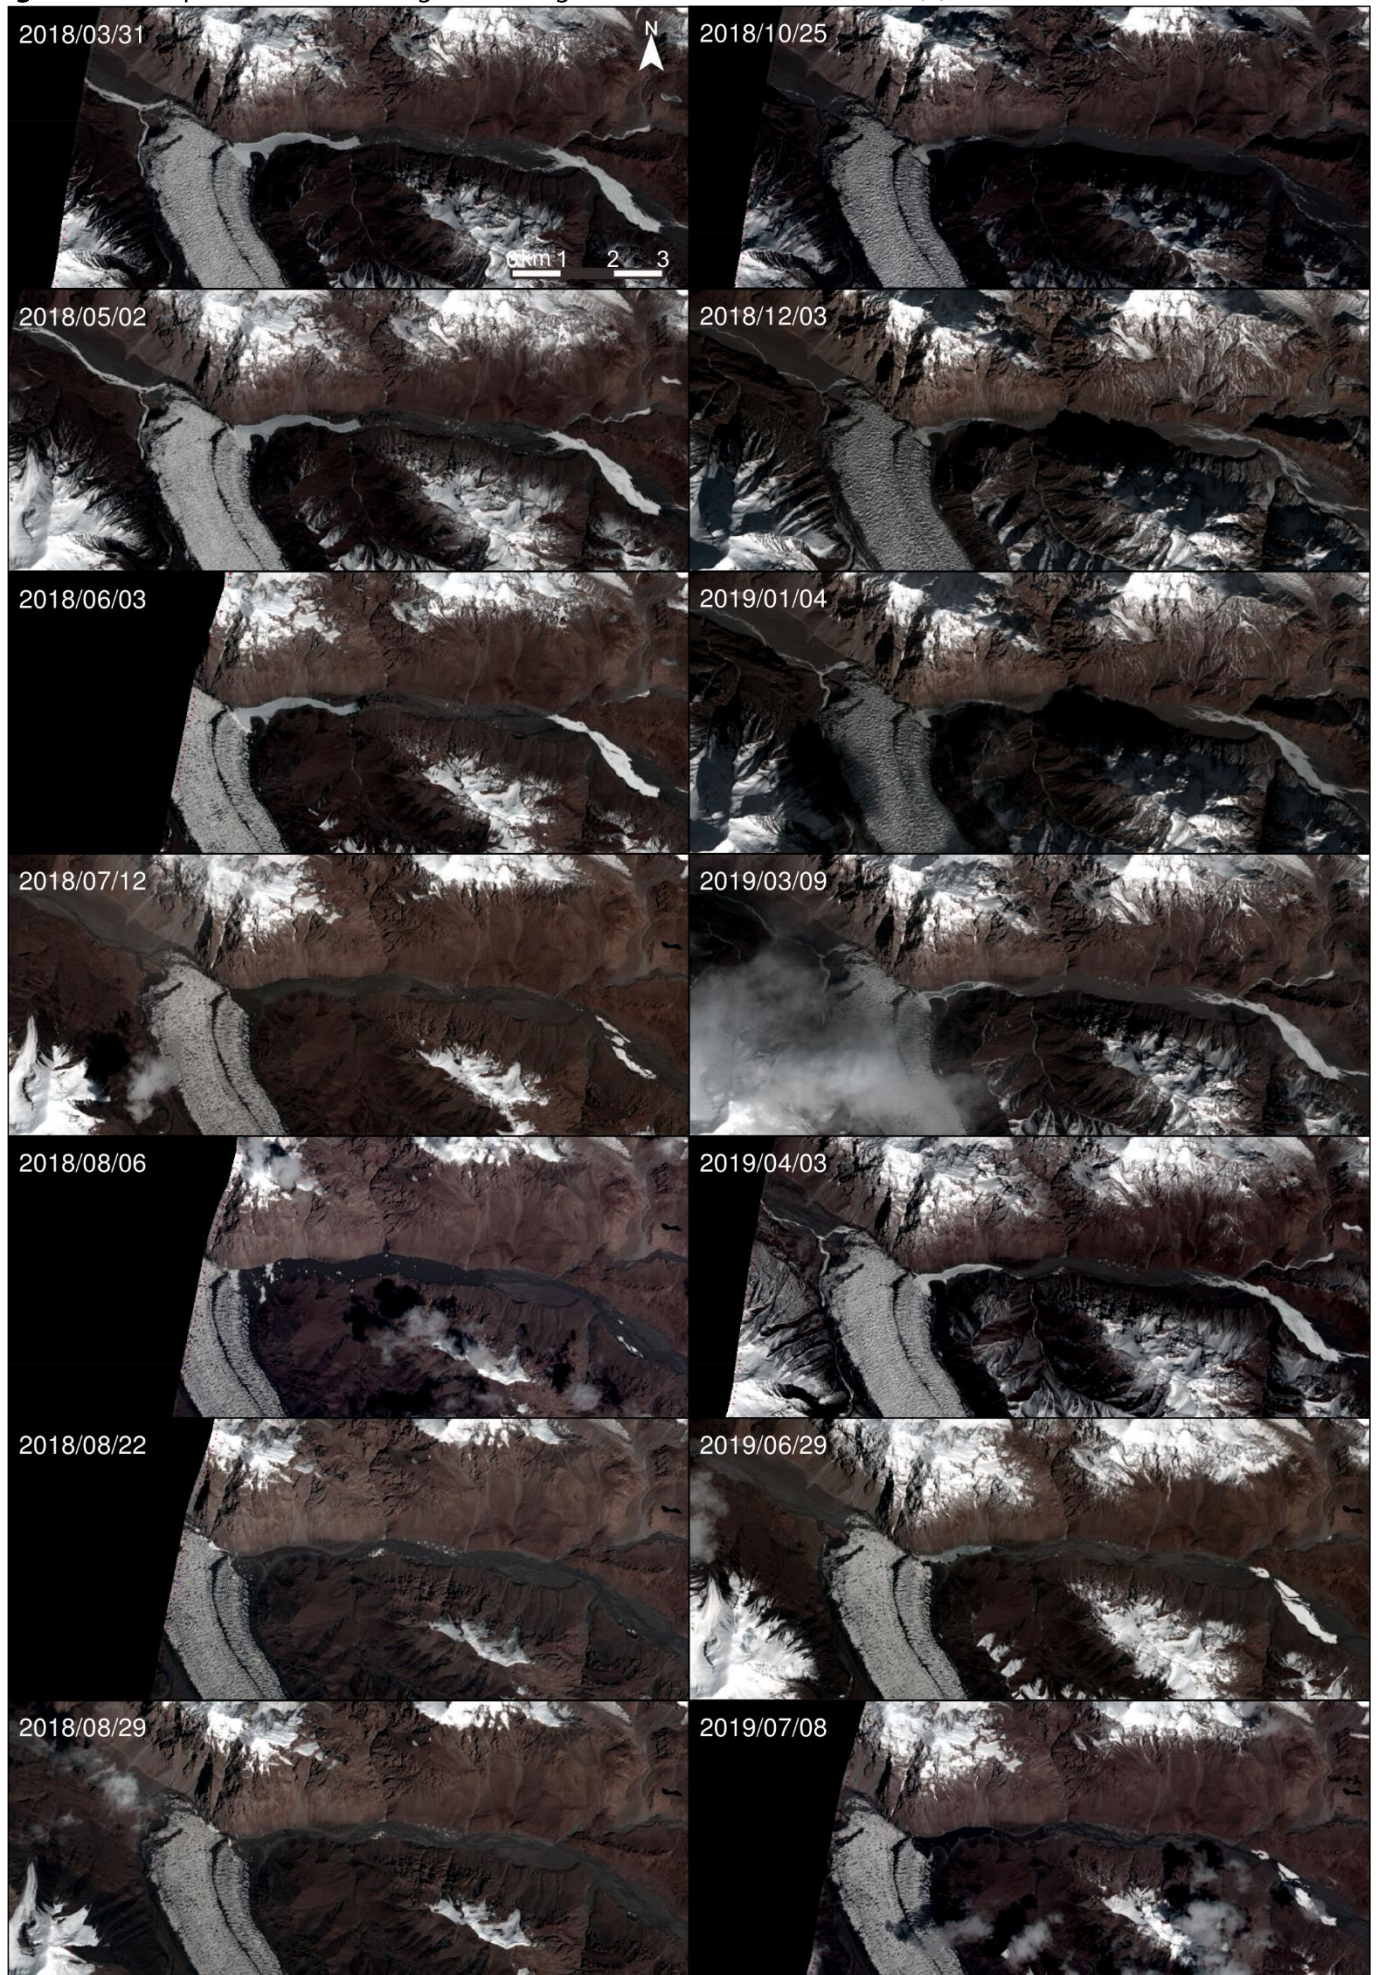

**Figure S10.** Sharpened Landsat images showing ice-dammed lake evolution (10).

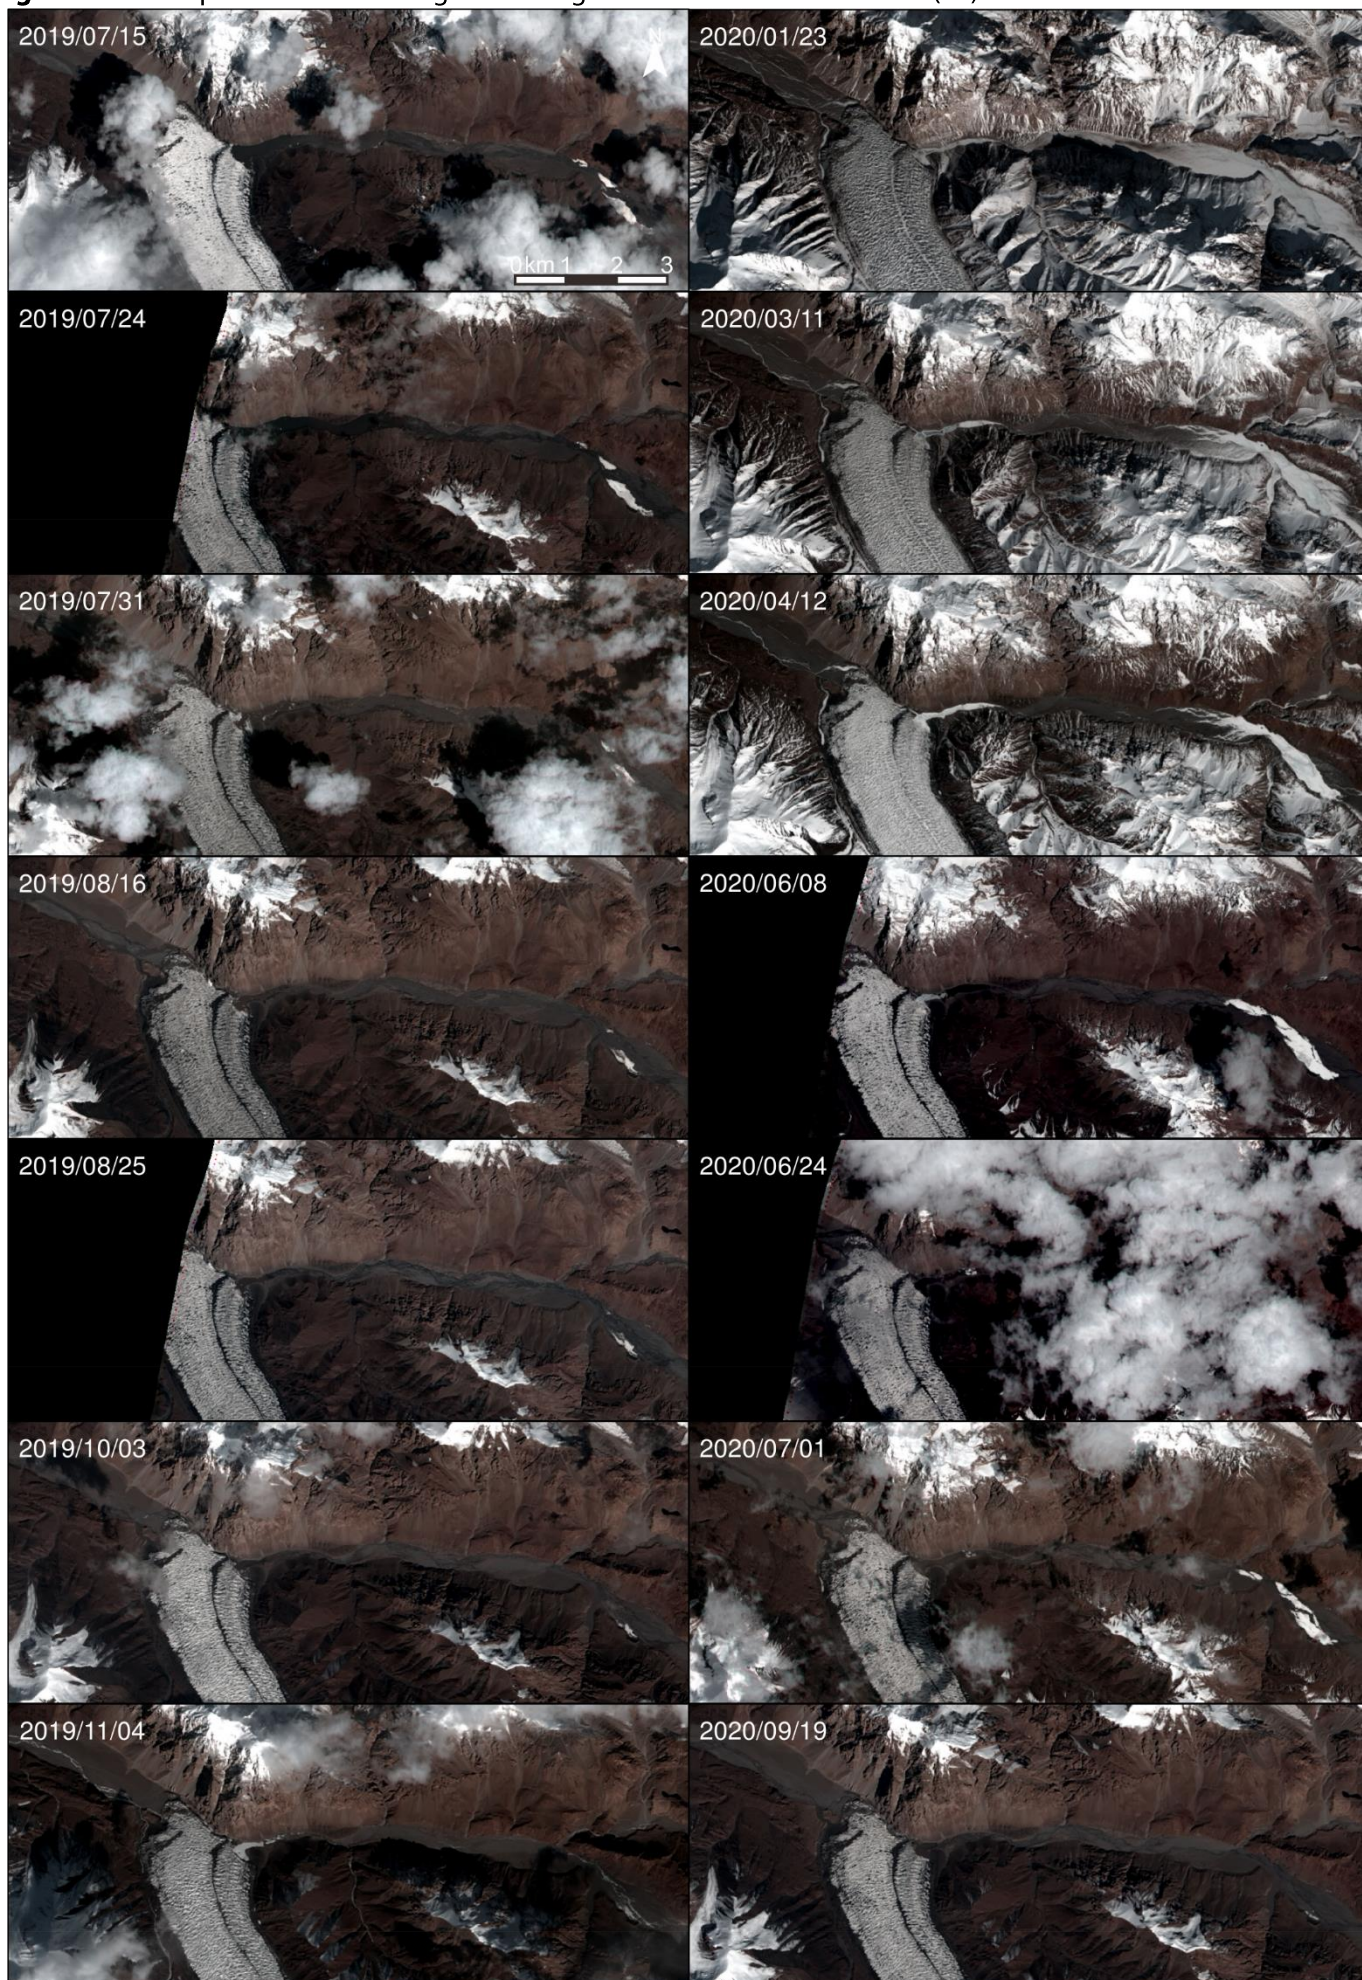

**Figure S11.** Sharpened Landsat images showing ice-dammed lake evolution (11).

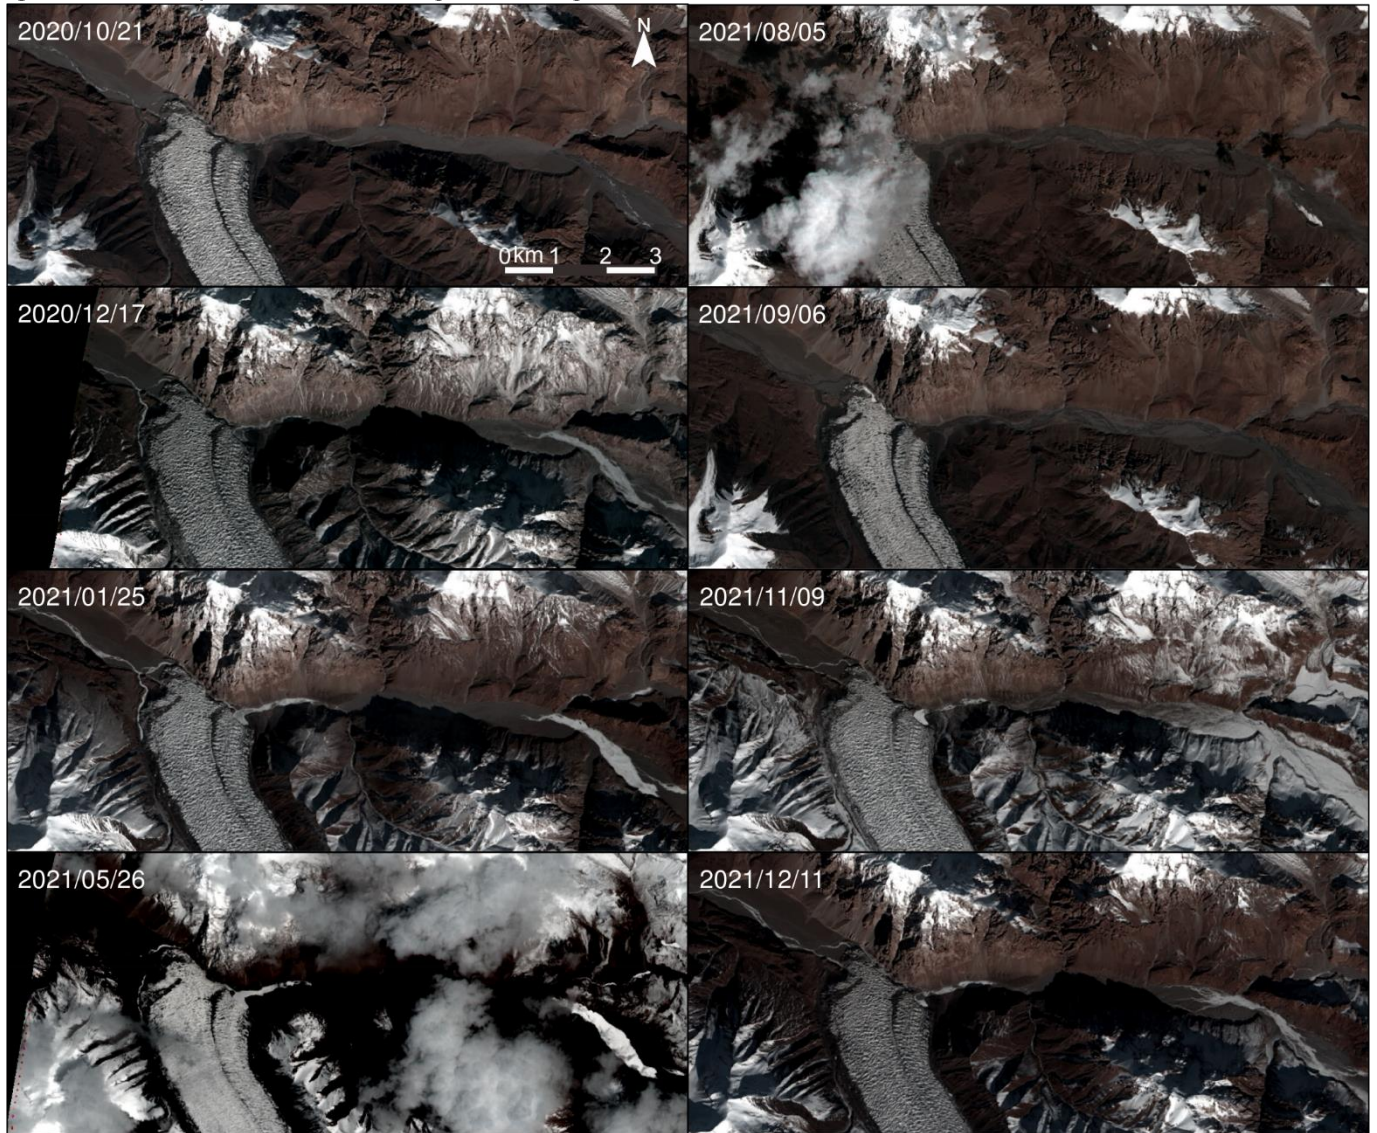

Supplement: Supplementary file 1 [file tc-2022-253-supplement.pdf]
